# Supplementary material for: Hydrodeoxygenation of guaiacol over physically mixed Co/TiO2 and WO3/TiO2 catalysts
Source: Royal Society of Chemistry journal article supplement (doi:10.1039/d3gc04400a), 2024-01-01
Supplement: d3gc04400a1.pdf [file d3gc04400a1.pdf]

[Electronic Supplementary Information]

**Hydrodeoxygenation of guaiacol over physically mixed Co/TiO<sub>2</sub> and WO<sub>3</sub>/TiO<sub>2</sub>  
catalysts**

Hyungjoo Kim<sup>a</sup>, Yong Hyun Lim<sup>a</sup>, Jae Hyun Park<sup>a</sup>, Jeong-Myeong Ha<sup>b</sup>, and Do Heui  
Kim<sup>a\*</sup>

<sup>a</sup>School of Chemical and Biological Engineering, and Institute of Chemical Process

Seoul National University

1, Gwanak-ro, Gwanak-gu, Seoul, 08826, Republic of Korea

\*E-mail: dohkim@snu.ac.kr

<sup>b</sup>Clean Energy Research Center

Korea Institute of Science and Technology (KIST)

Seoul 02792, Republic of Korea

**Table S1.** Price per gram of noble and non-noble metals commonly used in HDO catalysts. The price was obtained from <https://dailymetalprice.com> at 2023.09.05 and 2023.09.06.

| Metal     |    | Price (\$/g) |
|-----------|----|--------------|
| Noble     | Pd | 38.956       |
|           | Pt | 29.276       |
|           | Ru | 14.950       |
| <hr/>     |    |              |
| Non-noble | Co | 0.03342      |
|           | Ni | 0.02084      |
|           | Cu | 0.008254     |
|           | Fe | 0.0001190    |

**Table S2.** Summary of the literatures on guaiacol and alkyl substituted guaiacol HDO conducted by heterogeneous catalysts in batch reaction system.

| Reactant          | Catalyst                                                | Composition                         | Solvent                   | Reaction conditions |                            |         | Conv.<br>/ % | O-free HC<br>Yield / % | Ref.      |
|-------------------|---------------------------------------------------------|-------------------------------------|---------------------------|---------------------|----------------------------|---------|--------------|------------------------|-----------|
|                   |                                                         |                                     |                           | T<br>/°C            | P(H <sub>2</sub> )<br>/bar | t<br>/h |              |                        |           |
| Guaiacol          | Co/TiO <sub>2</sub> + WO <sub>3</sub> /TiO <sub>2</sub> | Co 10 wt.%, WO <sub>3</sub> 10 wt.% | n-Octane                  | 250                 | 10                         | 1       | 100          | 87                     | This work |
| Guaiacol          | Co/TiO <sub>2</sub>                                     | Co 10 wt.%                          | n-Octane                  | 250                 | 10                         | 1       | 100          | 6.4 (Cyclohexanol 83)* | This work |
| Guaiacol          | CoWO <sub>x</sub> /TiO <sub>2</sub>                     | Co 10 wt.%, WO <sub>3</sub> 10 wt.% | n-Octane                  | 250                 | 10                         | 1       | 0.5          | 0                      | This work |
| Guaiacol          | Ru/HZSM-5                                               | Ru 5 wt.%                           | Water                     | 240                 | 2                          | 1       | 100          | 96                     | [1]       |
| Guaiacol          | Ru/SBA-15                                               | Ru 5 wt.%                           | [Bmim]PF <sub>6</sub>     | 150                 | 20                         | 6       | >99.0        | 95                     | [2]       |
| Guaiacol          | Ru/CNT                                                  | Ru 5 wt.%                           | Water/<br>n-Dodecane      | 220                 | 50                         | 3       | 100          | 92                     | [3]       |
| 4-Propyl-guaiacol | Ru/C + Nb <sub>2</sub> O <sub>5</sub>                   | Ru 5 wt.%                           | Water (methanol additive) | 250                 | 6                          | 2       | 36           | 10                     | [4]       |
| 4-Propyl-guaiacol | Ru/C + Nb <sub>2</sub> O <sub>5</sub>                   | Ru 5 wt.%                           | Water (methanol additive) | 250                 | 6                          | 12      | 100          | 100                    | [4]       |
| Guaiacol          | Ru-WO <sub>x</sub> /SiAl                                | Ru 5 wt.%, WO <sub>x</sub> 30 wt.%  | Water                     | 250                 | 16                         | 1.5     | 100          | 88                     | [5]       |
| Guaiacol          | Ru/WZr                                                  | Ru 5 wt.%, W 10 wt.%                | Water                     | 270                 | 40                         | 1       | 96.8         | 55                     | [6]       |
| 4-Propyl-guaiacol | RuCoW <sub>x</sub> /NC                                  | 0.188 mmol Co and Ru                | n-Dodecane                | 240                 | 10                         | 4       | 100          | 95.2                   | [7]       |
| Guaiacol          | Ru/TiO <sub>2</sub>                                     | Ru 2 wt.%                           | Octane                    | 260                 | 10                         | 4       | 99.9         | 91                     | [8]       |
| Guaiacol          | Pt-WO <sub>3-x</sub>                                    | -                                   | n-hexane                  | 220                 | 30                         | 1       | 63.7         | 47                     | [9]       |
| Guaiacol          | Pt/HY                                                   | Pt 0.5 wt.%, Si/Al = 2.6            | Decane                    | 250                 | 40                         | 2       | 82.9         | 56                     | [10]      |
| Guaiacol          | Pd/WO <sub>x</sub> /Al <sub>2</sub> O <sub>3</sub>      | Pd 2 wt.%, W 32 wt.%                | n-Decane                  | 300                 | 70                         | 2.5     | 100          | 88                     | [11]      |
| Guaiacol          | Rh/ZrO <sub>2</sub>                                     | Rh 0.5 wt.%                         | n-Dodecane                | 300                 | 70                         | 3       | 100          | 88                     | [12]      |

|          |                                                          |                                     |               |     |    |     |      |                          |      |
|----------|----------------------------------------------------------|-------------------------------------|---------------|-----|----|-----|------|--------------------------|------|
| Guaiacol | Re/SiO <sub>2</sub>                                      | Re 7 wt. %                          | n-Heptane     | 280 | 20 | 1   | 98   | 57                       | [13] |
| Guaiacol | Co/SiO <sub>2</sub>                                      | Co 20 wt. %                         | n-Tetradecane | 300 | 10 | 1   | 100  | 93                       | [14] |
| Guaiacol | Co/SiO <sub>2</sub>                                      | Co 20 wt. %                         | n-Tetradecane | 300 | 50 | 1   | 100  | 98                       | [14] |
| Guaiacol | Sulfided<br>CoMo/<br>Al <sub>2</sub> O <sub>3</sub>      | -                                   | n-Tetradecane | 300 | 50 | 1   | 100  | 31<br>(Phenol<br>61)*    | [14] |
| Eugenol  | Co/TiO <sub>2</sub>                                      | Co 10 wt. %                         | n-Dodecane    | 200 | 10 | 2   | 100  | 0<br>(Alcohol<br>99.9)*  | [15] |
| Guaiacol | Co-MoO <sub>2</sub><br>@C                                | Co 4.71 wt. %<br>Mo 16.10<br>wt. %  | n-Hexane      | 340 | 8  | 4   | 97   | 61                       | [16] |
| Guaiacol | RANEY®<br>Ni +<br>Nafion/<br>SiO <sub>2</sub>            | 13 wt. %<br>Nafion/SiO <sub>2</sub> | Water         | 300 | 40 | 2   | 100  | 84                       | [17] |
| Guaiacol | Ni-WO <sub>x</sub> /<br>NiAl <sub>2</sub> O <sub>4</sub> | Ni 10 wt. %,<br>W 15 wt. %          | Dodecane      | 250 | 50 | 4   | 97.8 | 82                       | [18] |
| Guaiacol | Ni/<br>Beta-12.5                                         | Ni 15.7 wt. %                       | No solvent    | 250 | 40 | 3.3 | 99.5 | 70                       | [19] |
| Guaiacol | Ni/Nb <sub>2</sub> O <sub>5</sub>                        | Ni 20 wt. %                         | Water         | 200 | 25 | 5   | 93.6 | 0.3<br>(Alcohols<br>92)* | [20] |
| Guaiacol | Ni/Nb <sub>2</sub> O <sub>5</sub>                        | Ni 20 wt. %                         | Water         | 300 | 25 | 5   | 100  | 98                       | [20] |
| Guaiacol | Ni5Cu/<br>SZ-3                                           | Ni 10 wt. %,<br>Cu 5 wt. %          | Dodecane      | 300 | 50 | 8   | 100  | 93                       | [21] |

---

\* Yield of main products where oxygen is not fully removed.

**Table S3.** Comparison of the conversion and product yields for guaiacol HDO catalyzed by Co(10)/TiO<sub>2</sub>(R) physically mixed with WO<sub>3</sub>(10)/TiO<sub>2</sub>(R) and pristine TiO<sub>2</sub>(R). Reaction conditions: Catalyst 1 0.1 g, Catalyst 2 0.1 g, Guaiacol 2 mmol, *n*-octane 20 mL, 250 °C, H<sub>2</sub> 10 bar, 1 h.

| Entry | Catalyst 1                  | Catalyst 2                                | Conversion (%) | Product Yield (%) |      |     |      |     |
|-------|-----------------------------|-------------------------------------------|----------------|-------------------|------|-----|------|-----|
|       |                             |                                           |                | 1                 | 2    | 3   | 4    | 5   |
| 8     | Co(10)/TiO <sub>2</sub> (R) | WO <sub>3</sub> (10)/TiO <sub>2</sub> (R) | 100            | 25.4              | 59.1 | 1.3 | 0    | 0   |
| 11    | Co(10)/TiO <sub>2</sub> (R) | TiO <sub>2</sub> (R)                      | 100            | 0.9               | 3.3  | 0.2 | 87.8 | 7.0 |

**Table S4.** Atomic content of the Co(10)/TiO<sub>2</sub>(R) and WO<sub>3</sub>(10)/TiO<sub>2</sub>(R) fresh and AR catalysts obtained from ICP-AES. The number in parentheses represent the wt.% content of WO<sub>3</sub>.

| Catalyst                                  |       | Content (wt.%) |                      |
|-------------------------------------------|-------|----------------|----------------------|
|                                           |       | Co             | W (WO <sub>3</sub> ) |
| Co(10)/TiO <sub>2</sub> (R)               | Fresh | 10.6           | 0                    |
|                                           | AR    | 9.5            | 0.7 (0.8)            |
| WO <sub>3</sub> (10)/TiO <sub>2</sub> (R) | Fresh | 0              | 8.1 (10.2)           |
|                                           | AR    | 0.2            | 7.9 (9.9)            |

**Table S5.** Carbon content of fresh, AR, and AR\_400C of WO<sub>3</sub>(10)/TiO<sub>2</sub>(R)\_400C catalysts obtained elemental analysis.

| WO <sub>3</sub> (10)/TiO <sub>2</sub> (R) | C content (wt.%) |
|-------------------------------------------|------------------|
| Fresh                                     | 0.113 ± 0.033    |
| AR                                        | 0.399 ± 0.002    |
| AR_400C                                   | 0.076 ± 0.023    |

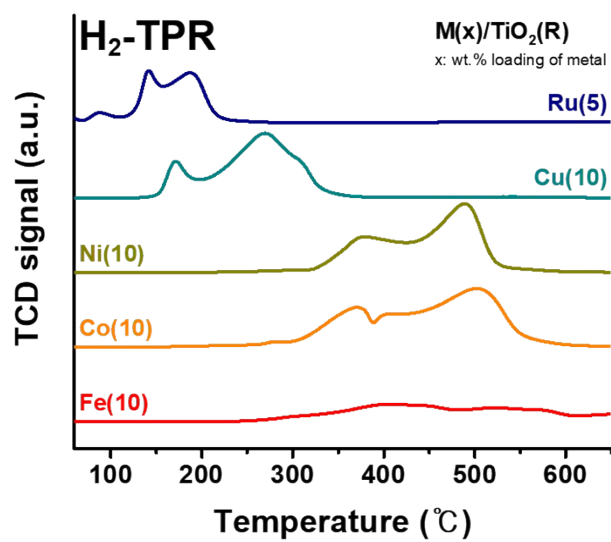

**Figure S1.** H<sub>2</sub>-TPR profiles of metal loaded rutile TiO<sub>2</sub> catalysts after calcination at 400 °C (M = Ru, Cu, Ni, Co, and Fe, x = wt.% loading of metal).

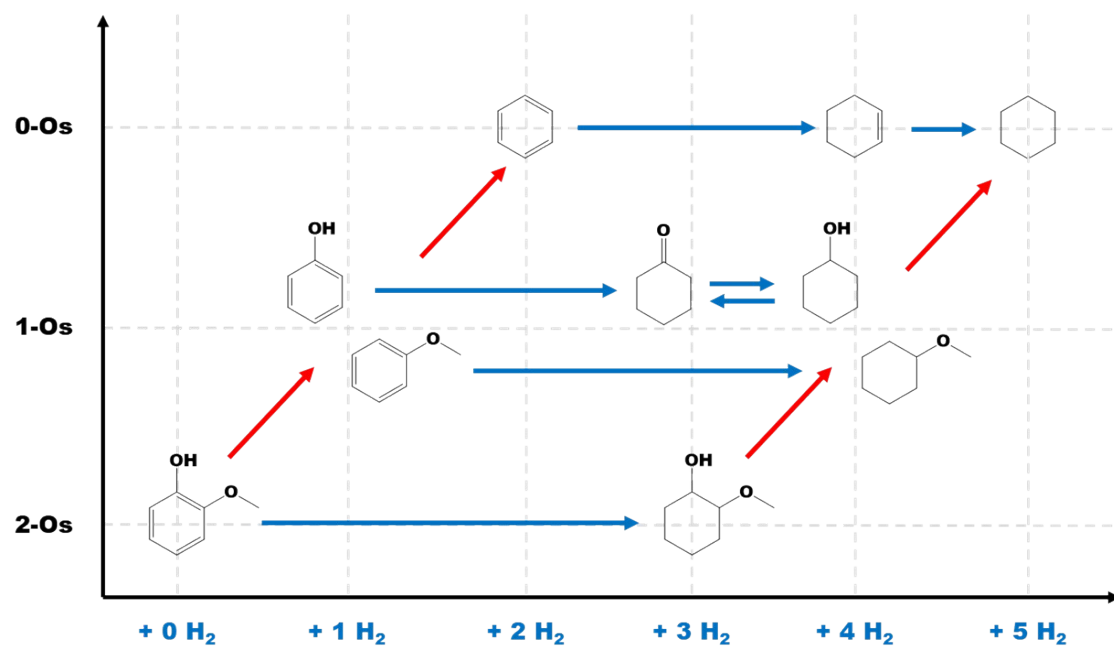

**Figure S2.** Simplified reaction pathway of guaiacol HDO.

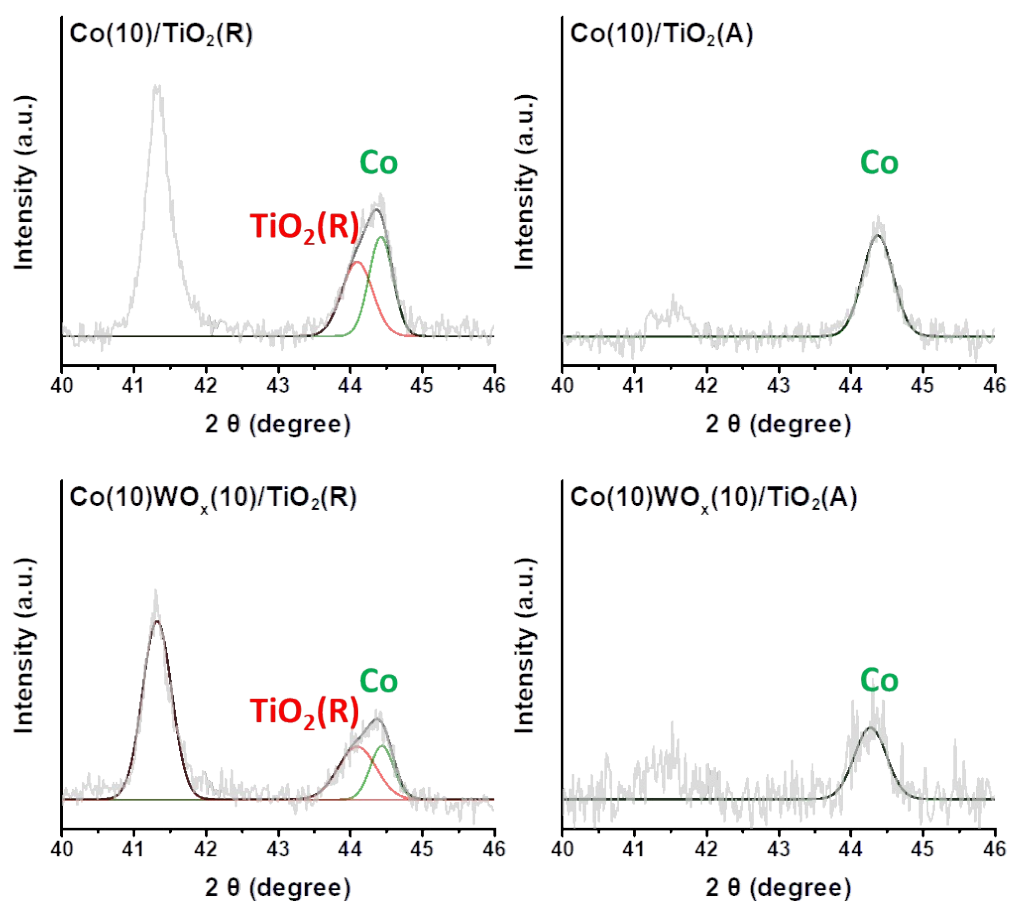

**Figure S3.** XRD patterns of the Co and W loaded catalysts.

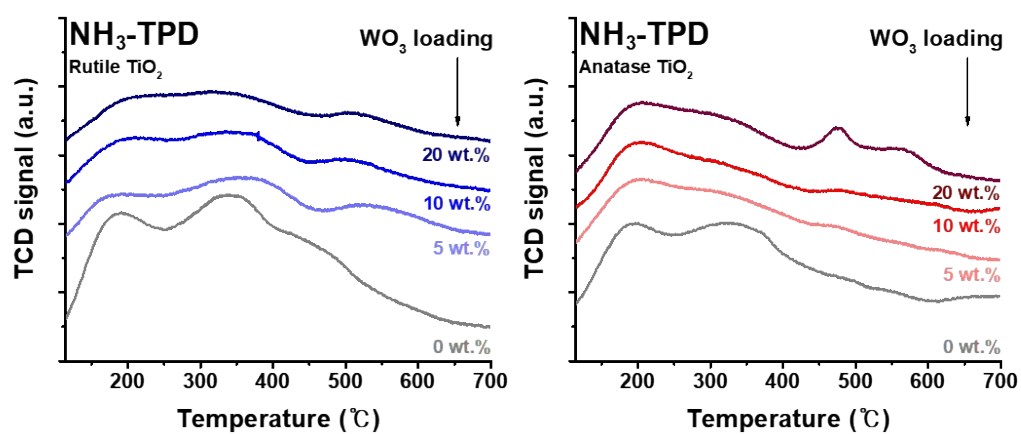

**Figure S4.** NH<sub>3</sub>-TPD profiles of the WO<sub>3</sub> loaded rutile and anatase TiO<sub>2</sub> catalysts with various WO<sub>3</sub> loadings.

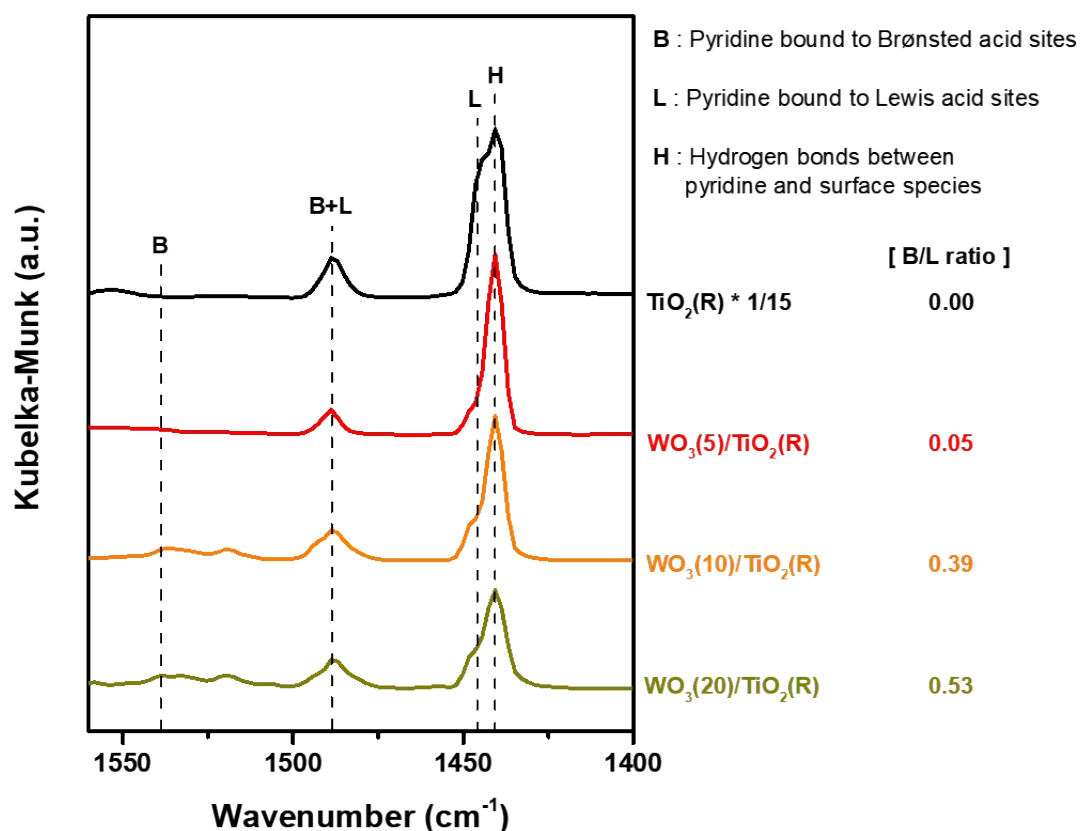

**Figure S5.** FTIR spectra of adsorbed pyridine over pristine TiO<sub>2</sub>(R) and WO<sub>3</sub> loaded TiO<sub>2</sub>(R) catalysts and corresponding B/L ratios. The deconvoluted peak areas of Lewis acid sites (1445 cm<sup>-1</sup>) and Brønsted acid sites (1540 cm<sup>-1</sup>) were used to quantify the B/L ratio, and molar extinction coefficients of 1.67 and 2.22 μmol<sup>-1</sup> were used for Brønsted and Lewis acid sites (J. Catal., 141 (1993) 347), respectively.

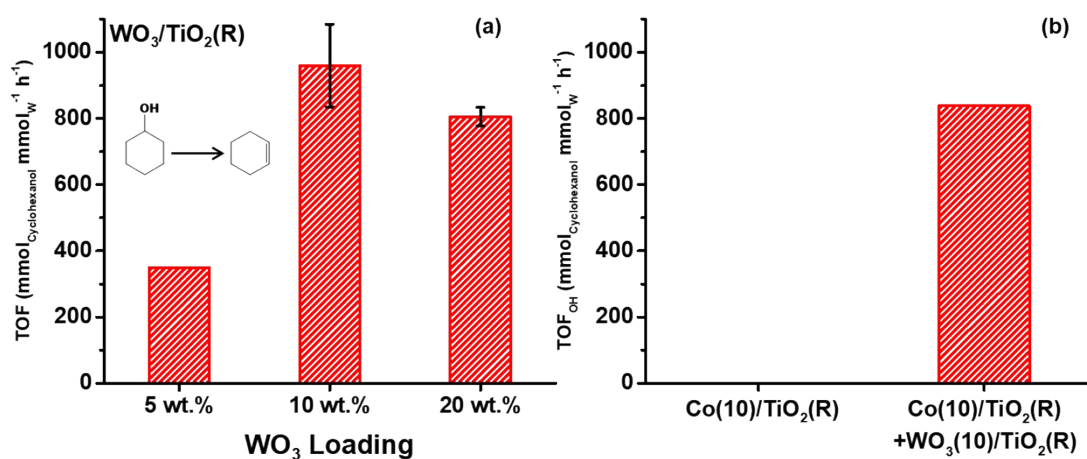

**Figure S6.** Turnover frequencies (TOFs) of (a) rutile  $\text{TiO}_2$  catalysts with different  $\text{WO}_3$  loadings and (b) Co loaded rutile  $\text{TiO}_2$  and PM catalyst in cyclohexanol dehydration reaction (The  $\text{TOF}_{\text{OH}}$  of  $\text{Co}(10)/\text{TiO}_2(\text{R})$  catalyst was calculated based on the amount of Co instead of W). Reaction condition: Cyclohexanol 2 mL, Catalyst 0.005 g each, *n*-octane 18 mL, 250 °C,  $\text{H}_2$  10 bar, 1 h.

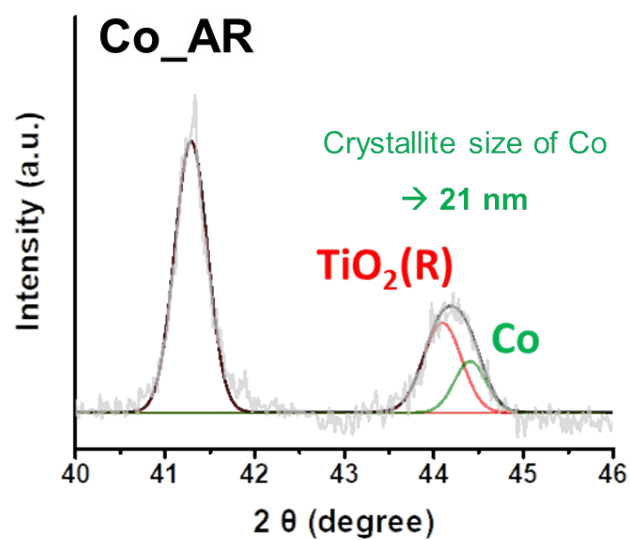

**Figure S7.** XRD pattern and crystallite size of metallic Co calculated from Scherrer equation of the Co\_AR catalyst.

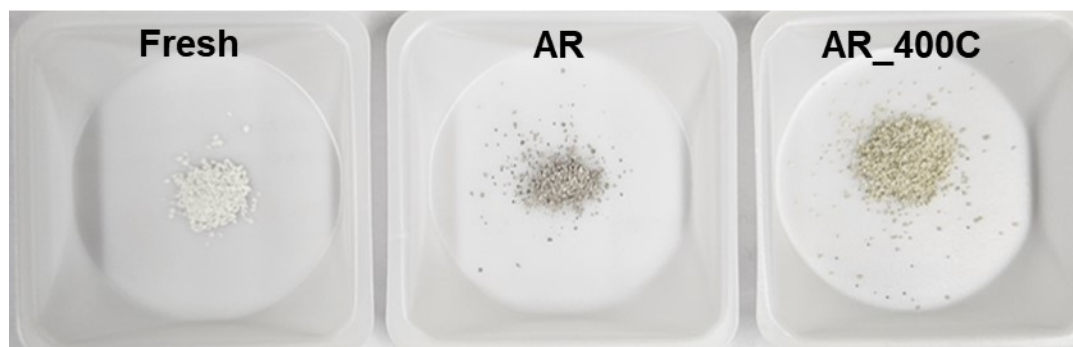

**Figure S8.** Photographs of fresh, AR, and AR\_400C of  $\text{WO}_3(10)/\text{TiO}_2(\text{R})$  catalyst.

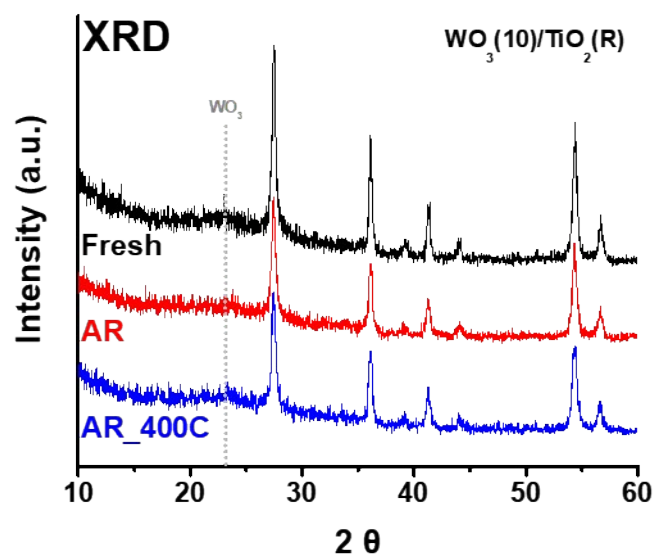

**Figure S9.** XRD patterns of fresh, AR, and AR\_400C of  $\text{WO}_3(10)/\text{TiO}_2(\text{R})$  catalyst.

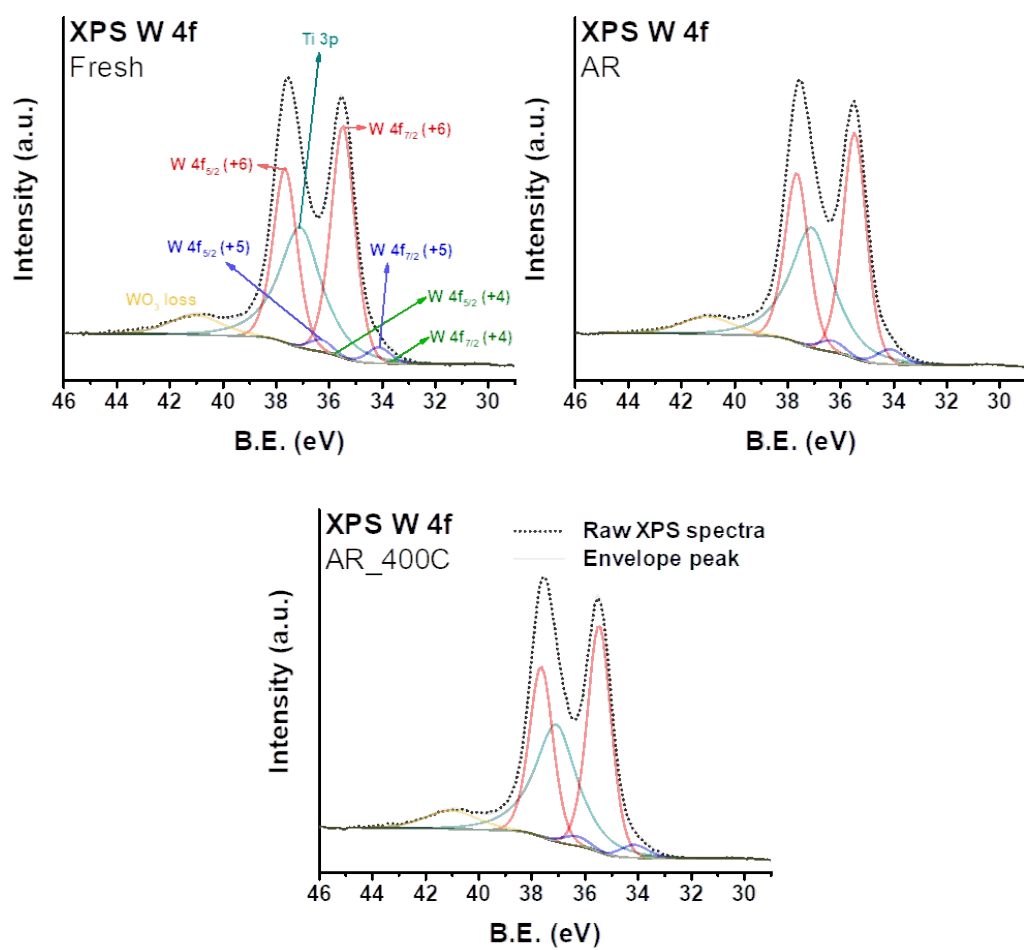

**Figure S10.** XPS W 4f spectra of fresh, AR, and AR\_400C of WO<sub>3</sub>(10)/TiO<sub>2</sub>(R)\_400C catalyst.

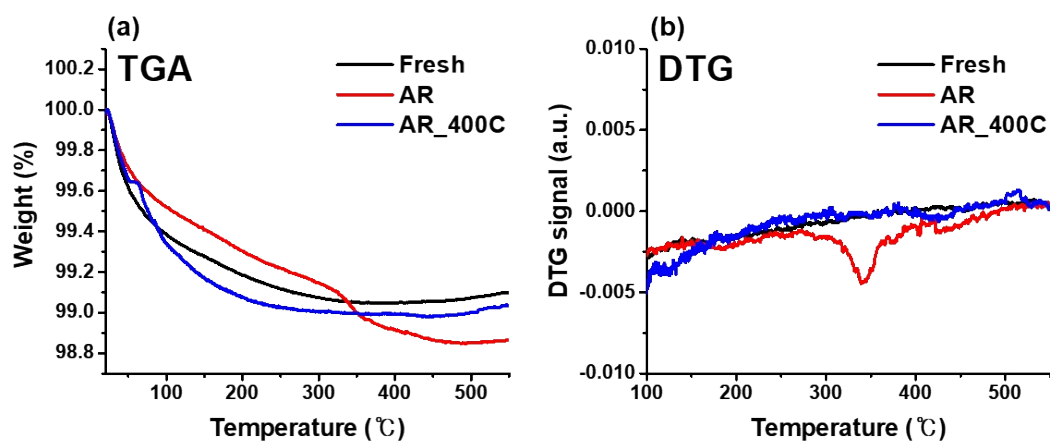

**Figure S11.** (a) TGA profiles and (b) DTG curves obtained from fresh, AR, and AR\_400C of  $\text{WO}_3(10)/\text{TiO}_2(\text{R})$  catalyst.

## References

1. Z. Luo, Z. Zheng, Y. Wang, G. Sun, H. Jiang and C. Zhao, *Green Chemistry*, 2016, **18**, 5845-5858.
2. S. Yang, X. Lu, H. Yao, J. Xin, J. Xu, Y. Kang, Y. Yang, G. Cai and S. Zhang, *Green Chemistry*, 2019, **21**, 597-605.
3. M.-Y. Chen, Y.-B. Huang, H. Pang, X.-X. Liu and Y. Fu, *Green Chemistry*, 2015, **17**, 1710-1717.
4. S. Li, B. Liu, J. Truong, Z. Luo, P. C. Ford and M. M. Abu-Omar, *Green Chemistry*, 2020, **22**, 7406-7416.
5. Y.-B. Huang, L. Yan, M.-Y. Chen, Q.-X. Guo and Y. Fu, *Green Chemistry*, 2015, **17**, 3010-3017.
6. A. A. Dwiatmoko, I. Kim, L. Zhou, J.-W. Choi, D. J. Suh, J. Jae and J.-M. Ha, *Applied Catalysis A: General*, 2017, **543**, 10-16.
7. M. Zhao, J. Hu, P. Lu, S. Wu, C. Liu and Y. Sun, *Fuel*, 2022, **326**, 125020.
8. R. Shu, B. Lin, J. Zhang, C. Wang, Z. Yang and Y. Chen, *Fuel Processing Technology*, 2019, **184**, 12-18.
9. M. Sun, Y. Zhang, W. Liu, X. Zhao, H. Luo, G. Miao, Z. Wang, S. Li and L. Kong, *Green Chemistry*, 2022, **24**, 9489-9495.
10. H. Lee, H. Kim, M. J. Yu, C. H. Ko, J.-K. Jeon, J. Jae, S. H. Park, S.-C. Jung and Y.-K. Park, *Scientific Reports*, 2016, **6**, 28765.
11. Y.-K. Hong, D.-W. Lee, H.-J. Eom and K.-Y. Lee, *Applied Catalysis B: Environmental*, 2014, **150-151**, 438-445.
12. Y. He, Y. Bie, J. Lehtonen, R. Liu and J. Cai, *Fuel*, 2019, **239**, 1015-1027.
13. Y. Jeong, C. W. Park, Y.-K. Park, J.-M. Ha, Y. Jeong, K.-Y. Lee and J. Jae, *Catalysis Today*, 2021, **375**, 164-173.
14. T. Mochizuki, S.-Y. Chen, M. Toba and Y. Yoshimura, *Applied Catalysis B: Environmental*, 2014, **146**, 237-243.
15. X. Liu, W. Jia, G. Xu, Y. Zhang and Y. Fu, *ACS Sustainable Chemistry & Engineering*, 2017, **5**, 8594-8601.
16. G.-H. Liu, Z.-M. Zong, Z.-Q. Liu, F.-J. Liu, Y.-Y. Zhang and X.-Y. Wei, *Fuel Processing Technology*, 2018, **179**, 114-123.
17. C. Zhao, Y. Kou, A. A. Lemonidou, X. Li and J. A. Lercher, *Chem Commun (Camb)*, 2010, **46**, 412-414.
18. X. Zhang, J. Wu, T. Li, C. Zhang, L. Zhu and S. Wang, *Chemical Engineering Journal*, 2022, **429**, 132181.
19. P. Yan, M. M.-J. Li, E. Kennedy, A. Adesina, G. Zhao, A. Setiawan and M. Stockenhuber, *Catalysis Science & Technology*, 2020, **10**, 810-825.
20. W. Song, Y. He, S. Lai, W. Lai, X. Yi, W. Yang and X. Jiang, *Green Chemistry*, 2020, **22**, 1662-1670.
21. X. Zhang, T. Wang, L. Ma, Q. Zhang, Y. Yu and Q. Liu, *Catalysis Communications*, 2013, **33**, 15-19.
